# Supplementary material for: Prevalence of depression or depressive symptoms among people living with HIV/AIDS in China: a systematic review and meta-analysis
Source: Springer Nature journal article supplement (doi:10.1186/s12888-018-1741-8), 2018-05-31
Supplement: MOESM6 [file 15809178]

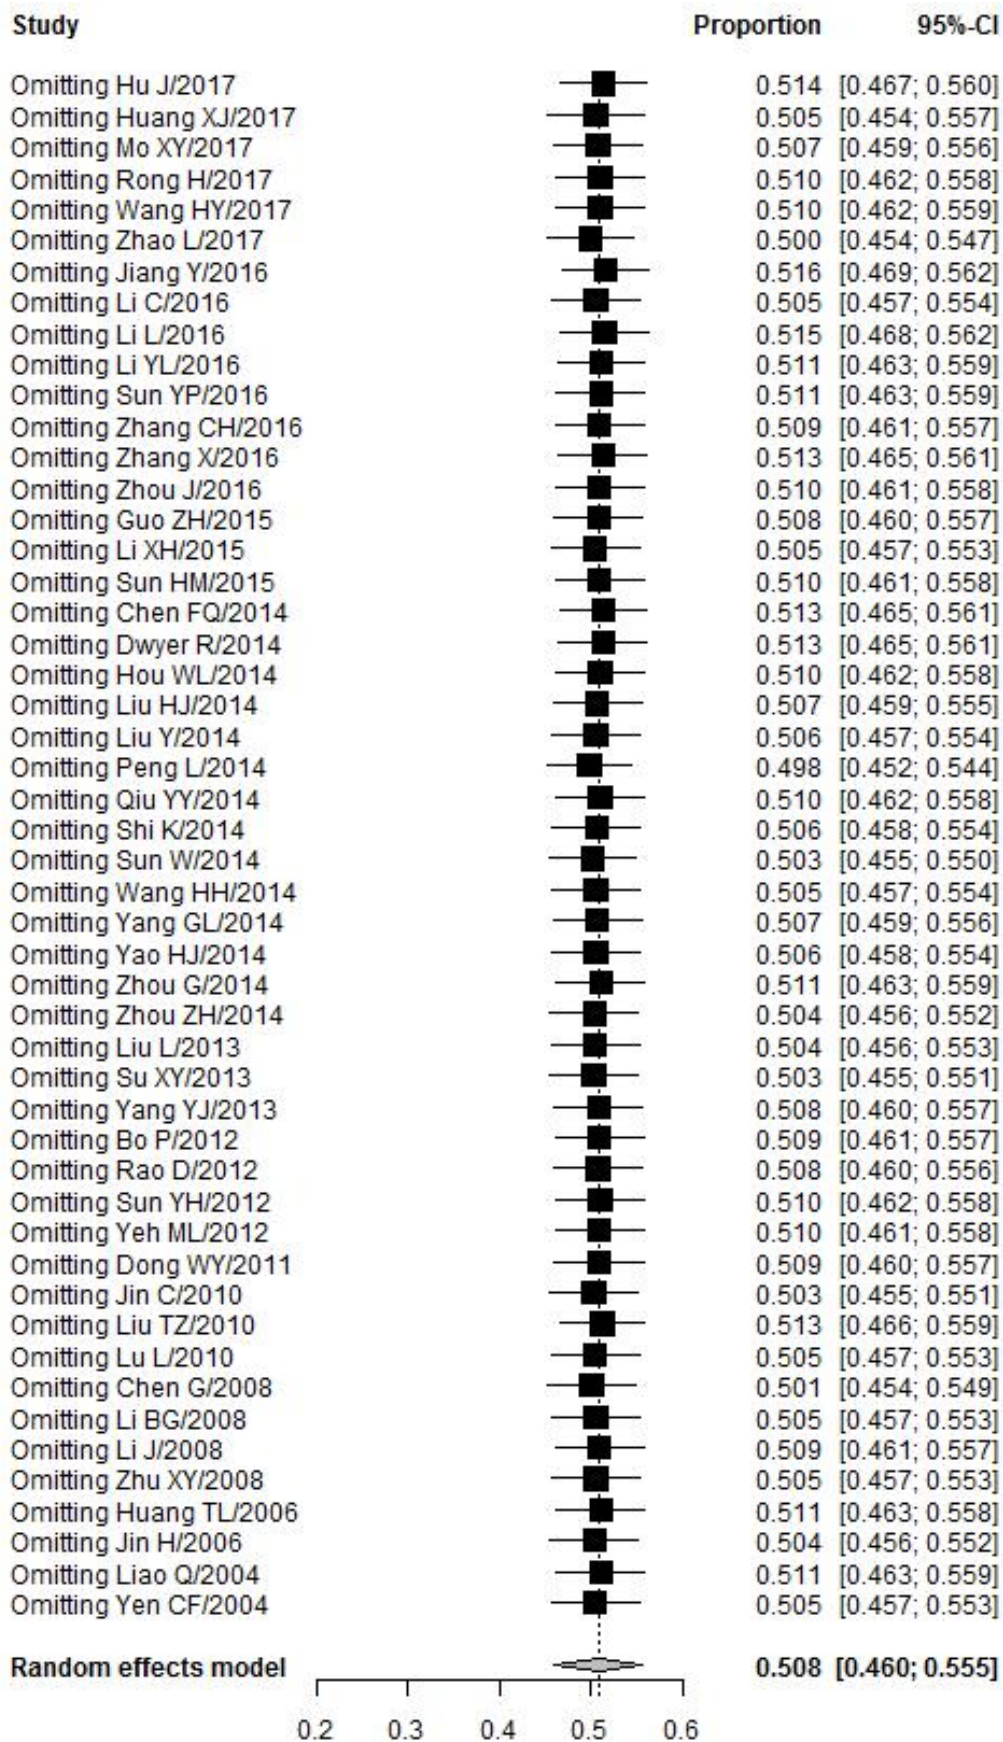

**Additional file 6** Sensitivity analysis of the prevalence of depression or depressive symptoms among people living with HIV/AIDS in China.
